# Supplementary material for: Improved objective identification of meteorological fronts: a case study with ERA-Interim
Source: Copernicus journal article supplement (doi:10.5194/gmd-2022-255), 2022-11-08
Supplement: Supplementary file 1 [file gmd-2022-255-supplement-version1.pdf]

# Objective identification of meteorological fronts: climatologies from ERA-Interim and ERA5 - Supplementary material

Philip G. Sansom and Jennifer L. Catto

December 30, 2023

## 1 Smoothing and threshold selection

Figure 1 compares the number of smoothing passes to the mean length of contours of  $\text{TFL} = \nabla^2 |\nabla\theta_W| = 0$  (Equation 1 in the main text) in terms of number of points located by the contouring algorithm. The mean length of contours increases rapidly at first before slowing to an approximately linear rate of increase above around eight smoothing passes. Eight smoothing passes does a good job of removing short circular contours and noise in longer contours. More than 10–12 smoothing passes and short or weak fronts appearing on charts of the time may not be correctly identified.

Figure 2 compares thresholds of TFP for criterion  $K_1$  in the main text. Thresholds are defined in terms of percentiles of TFP in the Northern Hemisphere extra-tropics (23.4°N–66.6°N). In Figure 2, criterion  $K_1$  provides a very well defined filter for potential front locations. As the threshold is relaxed to higher quantiles, more objects are identified that would not be classified as fronts by an operational meteorologist. When the threshold is reduced below the 15th percentile, the front extending from the Mediterranean to the east and north of the Alps is almost eliminated, and the front across southern Sweden is also shortened. Both fronts appeared on charts of the time, thus thresholds below the 15th percentile would be too harsh, eliminating too many potential fronts. Meanwhile above the 25th percentile quantile the number of spurious potential fronts increases rapidly.

Figure 3 compares thresholds of  $|\nabla\theta_W|_{ABZ}$  for criterion  $K_2$  in the main text. Thresholds are defined in terms of quantiles  $|\nabla\theta_W|_{ABZ}$  in the Northern Hemisphere extra-tropics (23.4°N–66.6°N). As the threshold is increased to higher quantiles, fewer fronts are identified until at the 60th percentile the front extending from the Mediterranean to the east and north of the Alps is split in two. Therefore, thresholds above the 55th percentile would be too harsh, eliminating too many potential fronts. Meanwhile, below the 50th percentile, the number of spurious potential fronts starts to increase.

30 Figure 4 compares thresholds of both TFP and  $|\nabla\theta_W|_{ABZ}$  for criteria  $K_1$   
 31 and  $K_2$  combined. The 50th percentile of  $|\nabla\theta_W|_{ABZ}$  clearly helps to eliminate a  
 32 number of spurious potential fronts compared to the 40th percentile. Therefore  
 33 the 50th quantile was chosen as the threshold for criterion  $K_2$ . In contrast, the  
 34 fronts identified are relatively insensitive to the choice of criterion  $K_1$  within  
 35 the range of the 15th to 25th quantiles of TFP. However, in other examples, the  
 36 15th and 20th percentiles were found to break, shorten or eliminate some fronts  
 37 identified on charts. The 25th percentile was found to be more suitable overall  
 38 and chosen as the threshold for criterion  $K_2$ .

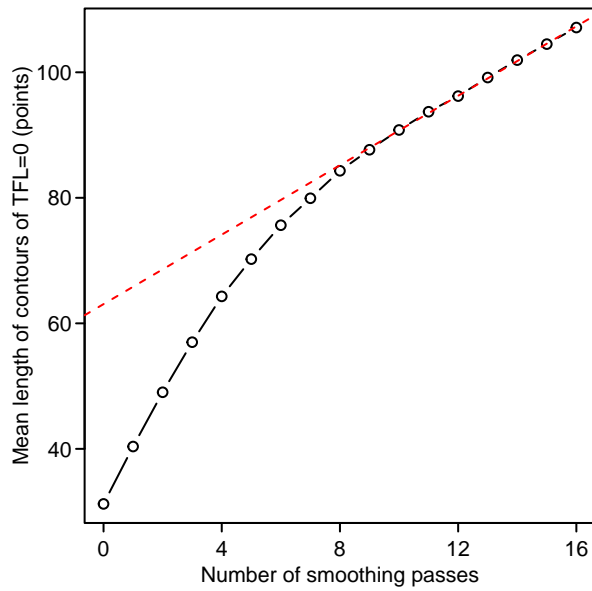

Figure 1: Comparison number of smoothing passes versus mean length of contours of  $TFL = \nabla^2 |\nabla\theta_W| = 0$  in terms of number of points located by the contouring algorithm during January 2000. Dashed red line shows the linear least squares fit to the mean number of points for  $n > 8$  smoothing passes.

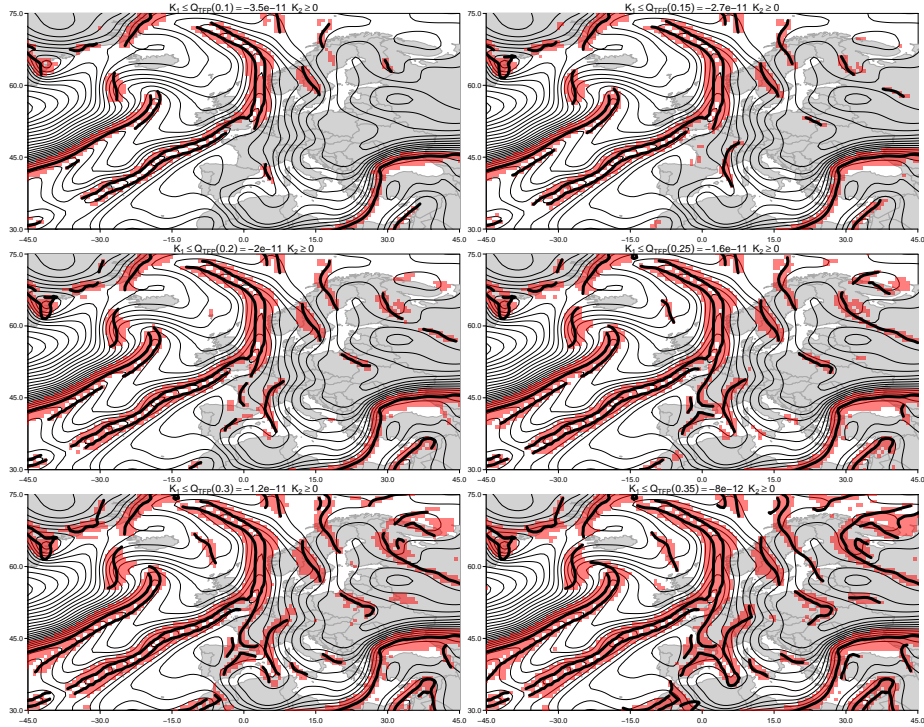

Figure 2: Comparison of thresholds of TFP for criterion  $K_1$  in ERA-Interim at 00:00 on 2001-01-01 with  $n = 8$  smoothing cycles. Threshold  $K_2$  is fixed at  $|\nabla\theta_W|_{ABZ} > 0 \text{ K m}^{-1}$  and thus provides no constraint on fronts identified.  $Q_{TFP}(p)$  indicate the  $p$ th percentile of TFP in the Northern Hemisphere extratropics ( $23.4^\circ\text{N}$ – $66.6^\circ\text{N}$ ). Red shading indicates the areas identified by criterion  $K_1$ . Thin black lines indicate contours of wet-bulb potential temperature  $\theta_W$ . Thick black lines indicates fronts identified according to the stated thresholds.

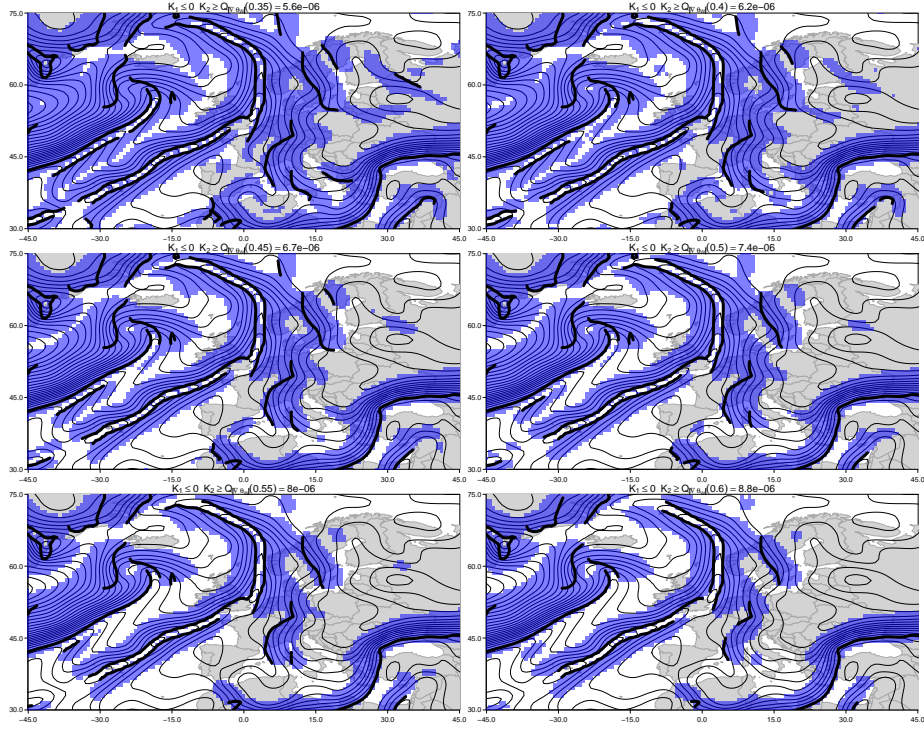

Figure 3: Comparison of thresholds of  $|\nabla\theta_W|_{ABZ}$  for criterion  $K_2$  in ERA-Interim at 00:00 on 2001-01-01 with  $n = 8$  smoothing cycles. Threshold  $K_1$  is fixed at  $\text{TFP} < 0 \text{ K m}^{-2}$  and thus provides the least possible constraint on fronts identified.  $Q_{|\nabla\theta_W|}(p)$  indicate the  $p$ th percentile of  $|\nabla\theta_W|_{ABZ}$  in the Northern Hemisphere extra-tropics ( $23.4^\circ\text{N}$ – $66.6^\circ\text{N}$ ). Blue shading indicates the areas identified by criterion  $K_2$ . Thin black lines indicate contours of wet-bulb potential temperature  $\theta_W$ . Thick black lines indicates fronts identified according to the stated thresholds.

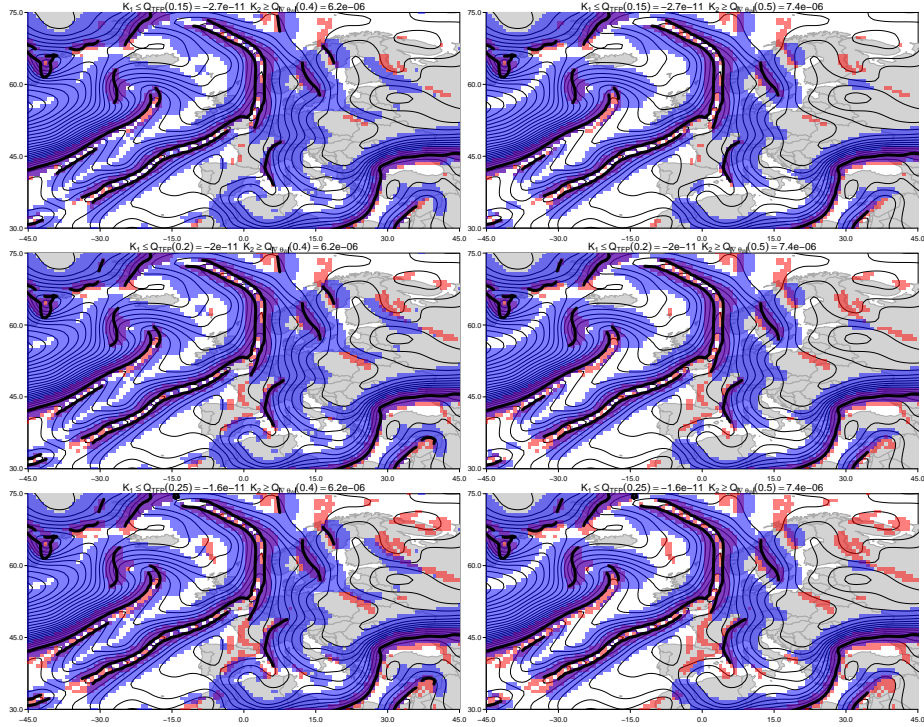

Figure 4: Comparison of thresholds of for criteria  $K_1$  and  $K_2$  in ERA-Interim at 00:00 on 2001-01-01 with  $n = 8$  smoothing cycles. Different thresholds for criterion  $K_1$  are compared (top)  $K_1 > Q_{TFP}(0.15)$ , (middle)  $K_1 > Q_{TFP}(0.20)$ , and (bottom)  $K_2 > Q_{TFP}(0.25)$ . Different thresholds for criterion  $K_2$  are compared (left)  $K_2 > Q_{|\nabla\theta_W|}(0.4)$ , and (right)  $K_2 > Q_{|\nabla\theta_W|}(0.5)$ . Purple shading indicates the areas where criteria  $K_1$  and  $K_2$  overlap. Thin black lines indicate contours of wet-bulb potential temperature  $\theta_W$ . Thick black lines indicates fronts identified according to the stated thresholds.
